# Supplementary material for: A Holistic Strategy of Mother and Child Health Care to Improve the Coverage of Routine and Polio Immunization in Pakistan: Results from a Demonstration Project
Source: MDPI journal article supplement (doi:10.3390/vaccines12010089), 2024-01-16
Supplement: s1 [file s1]

**Table S1.** Baseline immunization status by gender for children younger than 5 years and their families (N = 122,950).

| <b>Immunization Status</b>             | <b>Gender</b> | <b>Overall</b>    | <b>Karachi</b>    | <b>KP</b>         | <b>Baluchistan</b> |
|----------------------------------------|---------------|-------------------|-------------------|-------------------|--------------------|
| Full                                   | Boys          | 28,109<br>(41.7%) | 11,021<br>(57.2%) | 16,860<br>(35.6%) | 228 (26.7%)        |
|                                        | Girls         | 23,094<br>(41.6%) | 9988<br>(54.6%)   | 12,890<br>(35.5%) | 216<br>(26.4%)     |
| Partial                                | Boys          | 23,642<br>(35.5%) | 5496<br>(28.5%)   | 18,135<br>(38.3%) | 311 (35.0%)        |
|                                        | Girls         | 19,666<br>(35.5%) | 5418<br>(29.6%)   | 13,962<br>(38.4%) | 286<br>(34.9%)     |
| No routine EPI<br>(Zero dose children) | Boys          | 15,429<br>(22.9%) | 2766<br>(14.3%)   | 12,313<br>(26.1%) | 350 (39.3%)        |
|                                        | Girls         | 12,710<br>(22.9%) | 2886<br>(15.8%)   | 9507<br>(26.2%)   | 317<br>(38.7%)     |

Abbreviations: KP = Khyber Pakhtunkhwa.

**Table S2.** Vaccine status of children younger than 5 years at Baseline (N = 122, 950) and Endline (N = 133,996).

| <b>Province</b>            | <b>Karachi</b>       |                     | <b>KP</b>            |                     | <b>Baluchistan</b>   |                     |
|----------------------------|----------------------|---------------------|----------------------|---------------------|----------------------|---------------------|
| <b>Survey</b>              | <b>Baseline (BL)</b> | <b>Endline (EL)</b> | <b>Baseline (BL)</b> | <b>Endline (EL)</b> | <b>Baseline (BL)</b> | <b>Endline (EL)</b> |
| Children <5 years old      | 37,575               | 34,912              | 83,667               | 97,712              | 1708                 | 1372                |
| <b>Immunization factor</b> |                      |                     |                      |                     |                      |                     |
| Full immunization          | 21,009<br>(55.9%)    | 23,610<br>(67.6%)   | 29,750<br>(35.6%)    | 58,995<br>(60.4%)   | 444<br>(26.0%)       | 829<br>(60.4%)      |
| BCG                        | 31,563<br>(84.0%)    | 31,656<br>(90.7%)   | 38,263<br>(45.7%)    | 71,145<br>(72.8%)   | 718<br>(42.0%)       | 1142<br>(83.2%)     |
| <b>OPV</b>                 |                      |                     |                      |                     |                      |                     |
| 0                          | 31,260<br>(83.2%)    | 31,393<br>(89.9%)   | 48,735<br>(58.3%)    | 72,555<br>(74.3%)   | 978<br>(57.3%)       | 1131<br>(82.4%)     |
| 1                          | 28,757<br>(76.5%)    | 29,469<br>(84.4%)   | 50,467<br>(60.3%)    | 76,467<br>(78.3%)   | 966<br>(56.6%)       | 1133<br>(82.6%)     |
| 2                          | 26,809<br>(71.4%)    | 27,914<br>(80.0%)   | 49,254<br>(58.9%)    | 72,175<br>(73.9%)   | 903<br>(52.9%)       | 1063<br>(77.5%)     |
| 3                          | 25,123<br>(66.9%)    | 26,671<br>(76.4%)   | 48,302<br>(57.7%)    | 70,468<br>(72.1%)   | 803<br>(47.0%)       | 982<br>(71.6%)      |
| <b>Pentavalent</b>         |                      |                     |                      |                     |                      |                     |
| 1                          | 28,987<br>(77.0%)    | 29,616<br>(84.8%)   | 35,533<br>(42.5%)    | 72,352<br>(74.1%)   | 716<br>(41.9%)       | 1131<br>(82.4%)     |
| 2                          | 26,941<br>(71.7%)    | 28,037<br>(80.3%)   | 34,029<br>(40.7%)    | 67,442<br>(69.0%)   | 617<br>(36.1%)       | 1068<br>(77.8%)     |
| 3                          | 25,258<br>(67.2%)    | 26,789<br>(76.7%)   | 33,078<br>(39.5%)    | 64,620<br>(66.1%)   | 540<br>(31.6%)       | 985<br>(71.8%)      |
| <b>PCV</b>                 |                      |                     |                      |                     |                      |                     |
| 1                          | 21,293<br>(56.7%)    | 24,765<br>(70.9%)   | 35,023<br>(41.9%)    | 72,095<br>(73.8%)   | 693<br>(40.6%)       | 1134<br>(82.7%)     |
| 2                          | 19,706<br>(52.4%)    | 23,438<br>(67.1%)   | 33,651<br>(40.2%)    | 67,191<br>(68.8%)   | 613<br>(35.9%)       | 1065<br>(77.6%)     |

|                |                   |                   |                   |                   |                |                 |
|----------------|-------------------|-------------------|-------------------|-------------------|----------------|-----------------|
| 3              | 18,399<br>(49.0%) | 22,398<br>(64.2%) | 32,768<br>(39.2%) | 64,580<br>(66.1%) | 534<br>(31.3%) | 985<br>(71.8%)  |
| <b>Measles</b> |                   |                   |                   |                   |                |                 |
| 1              | 21,372<br>(56.9%) | 23,788<br>(68.1%) | 44,838<br>(53.6%) | 72,608<br>(74.3%) | 519<br>(30.4%) | 923<br>(67.3%)  |
| 2              | 17,135<br>(45.6%) | 20,008<br>(57.3%) | 36,438<br>(43.6%) | 57,985<br>(59.3%) | 438<br>(25.6%) | 722<br>(52.6%)  |
| IPV            | 6702 (17.8%)      | 17,656<br>(50.6%) | 4422 (5.3%)       | 36,099<br>(36.9%) | 587<br>(34.4%) | 1013<br>(73.8%) |

Abbreviations: Bacillus Calmette-Guerin vaccine, IPV = Inactivated Polio vaccine, KP = Khyber Pakhtunkhwa, OPV = Oral Polio vaccine, PCV = Pneumococcal conjugate vaccine.

**Table S3.** Characteristics of health camp attendees and vaccines delivered by region.

| Characteristic                                    | Karachi (N = 681,817) | KP (N = 181,244) | Baluchistan (N = 72,552) | p-Value      |
|---------------------------------------------------|-----------------------|------------------|--------------------------|--------------|
| Female                                            | 439,634 (64.5%)       | 104,531 (57.7%)  | 50,167 (69.2%)           | <0.001 *,†,‡ |
| Children <5 years old                             | 321, 641 (47.2%)      | 125,146 (69.1%)  | 33,975 (46.8%)           | <0.001 *,†   |
| Primary source of info:<br>community mobilization | 558,809 (82.0%)       | 133,179 (73.5%)  | 56,989 (78.6%)           | <0.001 *,†,‡ |
| Received antenatal care (ANC)                     | 6409 (0.9%)           | 9894 (5.5%)      | 236 (0.3%)               | <0.001 *,†,‡ |
| Vaccination card available                        | 86,979 (12.8%)        | 33,327 (18.4%)   | 15,638 (21.6%)           | <0.001 *,†,‡ |
| <b>Vaccinations delivered</b>                     |                       |                  |                          |              |
| BCG                                               | 12,074 (1.8%)         | 20,561 (11.3%)   | 4015 (5.5%)              | <0.001 *,†,‡ |
| <b>OPV</b>                                        |                       |                  |                          |              |
| 0                                                 | 7887 (1.2%)           | 9333 (5.2%)      | 1078 (1.5%)              | <0.001 *,†,‡ |
| 1                                                 | 8525 (1.3%)           | 26,957 (14.9)    | 1196 (1.7%)              | <0.001 *,†,‡ |
| 2                                                 | 5027 (0.7%)           | 8118 (4.5%)      | 910 (1.3%)               | <0.001 *,†,‡ |
| 3                                                 | 62,621 (9.2%)         | 12,925 (7.1%)    | 2707 (3.7%)              | <0.001 *,†,‡ |
| <b>Pentavalent</b>                                |                       |                  |                          |              |
| 1                                                 | 9690 (1.4%)           | 24,165 (13.3%)   | 2639 (3.6%)              | <0.001 *,†,‡ |
| 2                                                 | 4642 (0.7%)           | 7490 (4.1%)      | 1182 (1.6%)              | <0.001 *,†,‡ |
| 3                                                 | 11,337 (1.7%)         | 8674 (4.8%)      | 3020 (4.2%)              | <0.001 *,†,‡ |
| <b>PCV</b>                                        |                       |                  |                          |              |
| 1                                                 | 9209 (1.4%)           | 22,873 (12.6%)   | 2609 (3.6%)              | <0.001 *,†,‡ |
| 2                                                 | 4528 (0.7%)           | 7417 (4.1%)      | 1182 (1.6%)              | <0.001 *,†,‡ |
| 3                                                 | 11,130 (1.6%)         | 7423 (4.1%)      | 3016 (4.2%)              | <0.001 *,†   |
| <b>Measles</b>                                    |                       |                  |                          |              |
| 1                                                 | 26,531 (3.9%)         | 30,008 (16.6%)   | 3751 (5.2%)              | <0.001 *,†,‡ |
| 2                                                 | 53, 289 (7.8%)        | 9273 (5.1%)      | 16,408 (22.6%)           | <0.001 *,†,‡ |
| IPV                                               | 128,812 (18.9%)       | 83,160 (45.9%)   | 8466 (11.7%)             | <0.001 *,†,‡ |
| <b>Vaccination refusals</b>                       |                       |                  |                          |              |
| Routine immunization                              | 6655 (1.0%)           | 8 (<0.1%)        | 110 (0.2%)               | <0.001 *,†,‡ |
| OPV                                               | 463 (0.1%)            | 6 (<0.1%)        | 88 (0.1%)                | <0.001 *,†,‡ |
| IPV                                               | 947 (0.1%)            | 25,484 (14%)     | 48 (0.1%)                | <0.001 *,†,‡ |

Abbreviations: Bacillus Calmette-Guerin vaccine, IPV = Inactivated Polio vaccine, KP = Khyber Pakhtunkhwa, OPV = Oral Polio vaccine, PCV = Pneumococcal conjugate vaccine; \*  $p < 0.001$  (Bonferroni corrected) for Karachi vs. KP; †  $p < 0.001$  (Bonferroni corrected) for Karachi vs. Baluchistan; ‡  $p < 0.001$  (Bonferroni corrected) for KP vs. Baluchistan.

**Table S4.** Crude estimates of routine immunization coverage at Baseline (BL) and Endline (EL) for children under five years of age overall and by region.

| Immunization Factor | Overall              |                      |                      |          | Karachi              |                      |                      |          | KP                   |                      |                      |          | Baluchistan          |                      |                      |          |
|---------------------|----------------------|----------------------|----------------------|----------|----------------------|----------------------|----------------------|----------|----------------------|----------------------|----------------------|----------|----------------------|----------------------|----------------------|----------|
|                     | BL<br>(95% CI)       | EL<br>(95% CI)       | EL—BL<br>(95% CI)    | <i>p</i> | BL<br>(95% CI)       | EL<br>(95% CI)       | EL—BL<br>(95% CI)    | <i>p</i> | BL<br>(95% CI)       | EL<br>(95% CI)       | EL—BL<br>(95% CI)    | <i>p</i> | BL<br>(95% CI)       | EL<br>(95% CI)       | EL—BL<br>(95% CI)    | <i>p</i> |
| Full immunization   | 41.6<br>(41.4; 41.9) | 62.3<br>(62; 62.5)   | 20.6<br>(20.2; 21)   | <0.001   | 55.9<br>(55.4; 56.4) | 67.6<br>(67.1; 68.1) | 11.7<br>(11; 12.4)   | <0.001   | 35.6<br>(35.2; 35.9) | 60.4<br>(60.1; 60.7) | 24.8<br>(24.4; 25.3) | <0.001   | 26<br>(24; 28.1)     | 60.4<br>(57.8; 63)   | 34.4<br>(31.1; 37.7) | <0.001   |
| BCG                 | 57.4<br>(57.1; 57.7) | 77.6<br>(77.4; 77.8) | 20.2<br>(19.8; 20.5) | <0.001   | 84.0<br>(83.6; 84.4) | 90.7<br>(90.4; 91.0) | 6.7<br>(6.2; 7.2)    | <0.001   | 45.7<br>(45.4; 46.1) | 72.8<br>(72.5; 73.1) | 27.1<br>(26.6; 27.5) | <0.001   | 42<br>(39.7; 44.4)   | 83.2<br>(81.2; 85.1) | 41.2<br>(38.1; 44.3) | <0.001   |
| OPV                 |                      |                      |                      |          |                      |                      |                      |          |                      |                      |                      |          |                      |                      |                      |          |
| 0                   | 65.9<br>(65.6; 66.1) | 78.4<br>(78.2; 78.6) | 12.6<br>(12.2; 12.9) | <0.001   | 83.2<br>(82.8; 83.6) | 89.9<br>(89.6; 90.2) | 6.7<br>(6.2; 7.2)    | <0.001   | 58.2<br>(57.9; 58.6) | 74.3<br>(74; 74.5)   | 16<br>(15.6; 16.4)   | <0.001   | 57.3<br>(54.9; 59.6) | 82.4<br>(80.3; 84.4) | 25.2<br>(22.1; 28.3) | <0.001   |
| 1                   | 65.9<br>(65.6; 66.1) | 80.4<br>(80.1; 80.6) | 14.5<br>(14.2; 14.8) | <0.001   | 77.9<br>(77.4; 78.3) | 85.6<br>(85.2; 85.9) | 7.7<br>(7.1; 8.3)    | <0.001   | 60.7<br>(60.4; 61)   | 78.5<br>(78.2; 78.7) | 17.8<br>(17.3; 18.2) | <0.001   | 57.5<br>(55.1; 59.8) | 84.3<br>(82.3; 86.2) | 26.9<br>(23.8; 30)   | <0.001   |
| 2                   | 63.8<br>(63.6; 64.1) | 76.5<br>(76.2; 76.7) | 12.6<br>(12.3; 13)   | <0.001   | 73.8<br>(73.3; 74.2) | 82.4<br>(82.0; 82.8) | 8.6<br>(8; 9.2)      | <0.001   | 59.7<br>(59.3; 60)   | 74.4<br>(74.1; 74.6) | 14.7<br>(14.3; 15.1) | <0.001   | 54.5<br>(52.1; 56.9) | 80.6<br>(78.4; 82.7) | 26.1<br>(22.9; 29.3) | <0.001   |
| 3                   | 61.9<br>(61.6; 62.2) | 74.4<br>(74.1; 74.6) | 12.5<br>(12.1; 12.8) | <0.001   | 69.9<br>(69.4; 70.4) | 79.3<br>(78.8; 79.7) | 9.3<br>(8.7; 10)     | <0.001   | 58.7<br>(58.4; 59)   | 72.7<br>(72.4; 73)   | 14<br>(13.5; 14.4)   | <0.001   | 48.4<br>(46; 50.8)   | 74.9<br>(72.5; 77.2) | 26.5<br>(23.1; 29.9) | <0.001   |
| Pentavalent         |                      |                      |                      |          |                      |                      |                      |          |                      |                      |                      |          |                      |                      |                      |          |
| 1                   | 53.6<br>(53.3; 53.8) | 77.4<br>(77.1; 77.6) | 23.8<br>(23.5; 24.2) | <0.001   | 78.5<br>(78.1; 78.9) | 86.0<br>(85.6; 86.4) | 7.5<br>(7; 8.1)      | <0.001   | 42.8<br>(42.4; 43.1) | 74.2<br>(74; 74.5)   | 31.5<br>(31; 31.9)   | <0.001   | 42.7<br>(40.4; 45.1) | 84.2<br>(82.1; 86)   | 41.5<br>(38.4; 44.5) | <0.001   |
| 2                   | 51.1<br>(50.8; 51.4) | 73<br>(72.8; 73.2)   | 21.9<br>(21.5; 22.3) | <0.001   | 74.2<br>(73.7; 74.6) | 82.8<br>(82.4; 83.2) | 8.6<br>(8; 9.2)      | <0.001   | 41.3<br>(40.9; 41.6) | 69.5<br>(69.2; 69.8) | 28.2<br>(27.8; 28.7) | <0.001   | 37.5<br>(35.2; 39.9) | 80.9<br>(78.6; 82.9) | 43.4<br>(40.2; 46.5) | <0.001   |
| 3                   | 49.1<br>(48.8; 49.4) | 70<br>(69.8; 70.3)   | 20.9<br>(20.5; 21.3) | <0.001   | 70.3<br>(69.8; 70.8) | 79.6<br>(79.2; 80.1) | 9.3<br>(8.7; 10)     | <0.001   | 40.3<br>(39.9; 40.6) | 66.6<br>(66.3; 66.9) | 26.4<br>(25.9; 26.8) | <0.001   | 32.8<br>(30.6; 35.1) | 75.1<br>(72.6; 77.3) | 42.2<br>(39; 45.5)   | <0.001   |
| PCV                 |                      |                      |                      |          |                      |                      |                      |          |                      |                      |                      |          |                      |                      |                      |          |
| 1                   | 46.8<br>(46.5; 47.1) | 73.5<br>(73.3; 73.8) | 26.7<br>(26.4; 27.1) | <0.001   | 57.5<br>(57.0; 58.0) | 71.8<br>(71.3; 72.3) | 14.2<br>(13.5; 14.9) | <0.001   | 42.2<br>(41.8; 42.5) | 74<br>(73.7; 74.3)   | 31.8<br>(31.4; 32.3) | <0.001   | 41.4<br>(39; 43.7)   | 84.4<br>(82.4; 86.3) | 43.1<br>(40; 46.1)   | <0.001   |
| 2                   | 44.8<br>(44.5; 45)   | 69.3<br>(69.1; 69.6) | 24.6<br>(24.2; 24.9) | <0.001   | 54.1<br>(53.6; 54.6) | 69.0<br>(68.5; 69.5) | 14.9<br>(14.2; 15.7) | <0.001   | 40.8<br>(40.5; 41.2) | 69.3<br>(69; 69.5)   | 28.4<br>(28; 28.9)   | <0.001   | 37.2<br>(34.9; 39.5) | 80.7<br>(78.5; 82.7) | 43.5<br>(40.4; 46.7) | <0.001   |
| 3                   | 43.1<br>(42.8; 43.4) | 66.6<br>(66.4; 66.9) | 23.5<br>(23.2; 23.9) | <0.001   | 51.1<br>(50.5; 51.6) | 66.4<br>(65.9; 66.9) | 15.4<br>(14.6; 16.1) | <0.001   | 39.9<br>(39.5; 40.2) | 66.6<br>(66.3; 66.9) | 26.7<br>(26.3; 27.2) | <0.001   | 32.4<br>(30.2; 34.7) | 75.1<br>(72.6; 77.3) | 42.7<br>(39.4; 45.9) | <0.001   |
| Measles             |                      |                      |                      |          |                      |                      |                      |          |                      |                      |                      |          |                      |                      |                      |          |
| 1                   | 59.3<br>(59; 59.6)   | 77.6<br>(77.4; 77.9) | 18.3<br>(18; 18.7)   | <0.001   | 65.5<br>(65.0; 66.0) | 76.9<br>(76.4; 77.4) | 11.4<br>(10.7; 12.1) | <0.001   | 57.2<br>(56.8; 57.5) | 77.9<br>(77.6; 78.1) | 20.7<br>(20.3; 21.1) | <0.001   | 34.7<br>(32.3; 37.2) | 78<br>(75.5; 80.3)   | 43.3<br>(39.9; 46.7) | <0.001   |
| 2                   | 52.9<br>(52.6; 53.3) | 69.8<br>(69.5; 70)   | 16.8<br>(16.4; 17.2) | <0.001   | 59.1<br>(58.5; 59.7) | 73.0<br>(72.4; 73.5) | 13.9<br>(13.1; 14.6) | <0.001   | 57.2<br>(56.8; 57.5) | 68.6<br>(68.3; 68.9) | 17.8<br>(17.3; 18.3) | <0.001   | 33.2<br>(30.6; 35.8) | 74.2<br>(71.3; 76.9) | 41<br>(37.2; 44.8)   | <0.001   |
| IPV                 | 10.4<br>(10.2; 10.6) | 46.2<br>(45.9; 46.4) | 35.8<br>(35.4; 36.1) | <0.001   | 24.4<br>(23.8; 24.9) | 58.5<br>(57.9; 59.0) | 34.1<br>(33.4; 34.9) | <0.001   | 5.3<br>(5.1; 5.4)    | 41.5<br>(41.1; 41.8) | 36.2<br>(35.8; 36.5) | <0.001   | 34.4<br>(32.2; 36.7) | 73.8<br>(71.4; 76.1) | 39.5<br>(36.2; 42.7) | <0.001   |

Abbreviations: Bacillus Calmette-Guerin vaccine, CI = Confidence interval, IPV = Inactivated Polio vaccine, KP = Khyber Pakhtunkhwa, OPV = Oral Polio vaccine, PCV = Pneumococcal conjugate vaccine.
